# Supplementary material for: Renal effects of treatment with a TLR4 inhibitor in conscious septic sheep
Source: PubMed Central journal article supplement (PMC4190385; doi:10.1186/s13054-014-0488-y), 2014-09-03
Supplement: 13054_2014_488_MOESM3_ESM.pdf [file 13054_2014_488_MOESM3_ESM.pdf]

|                            |         | Group |      | Baseline |      | 6    |      | 12   |      | 18   |      | 24   |      | 30   |      | 36   |    |
|----------------------------|---------|-------|------|----------|------|------|------|------|------|------|------|------|------|------|------|------|----|
|                            |         | Mean  | SD   | Mean     | SD   | Mean | SD   | Mean | SD   | Mean | SD   | Mean | SD   | Mean | SD   | Mean | SD |
| Temperature<br>(°C)        | Control | 39,0  | 0,3  | 40,5     | 0,6  | 40,6 | 0,4  | 41,2 | 0,4  | 40,9 | 0,3  | 40,8 | 0,5  | 40,7 | 0,5  |      |    |
|                            | TAK-242 | 39,0  | 0,2  | 40,0     | 0,4  | 40,2 | 0,4  | 40,1 | 0,5  | 40,2 | 0,6  | 40,2 | 0,7  | 40,3 | 0,7  |      |    |
| pO <sub>2</sub><br>(kPa)   | Control | 14,0  | 1,0  | 12,8     | 1,1  | 12,3 | 0,6  | 11,7 | 1,0  | 11,5 | 1,0  | 10,5 | 0,6  | 9,3  | 1,8  |      |    |
|                            | TAK-242 | 13,5  | 1,3  | 12,3     | 1,6  | 11,4 | 1,4  | 11,0 | 1,8  | 11,2 | 1,1  | 11,6 | 1,5  | 11,7 | 1,2  |      | *  |
| pCO <sub>2</sub><br>(kPa)  | Control | 4,5   | 0,6  | 4,0      | 0,5  | 4,0  | 0,6  | 4,0  | 0,8  | 4,1  | 0,8  | 4,5  | 0,8  | 4,9  | 0,6  |      |    |
|                            | TAK-242 | 4,2   | 1,0  | 3,7      | 0,5  | 4,1  | 0,4  | 4,1  | 0,5  | 4,4  | 0,6  | 4,6  | 0,7  | 4,8  | 0,6  |      |    |
| pH                         | Control | 7,44  | 0,07 | 7,47     | 0,03 | 7,51 | 0,05 | 7,52 | 0,05 | 7,55 | 0,04 | 7,54 | 0,03 | 7,52 | 0,04 |      |    |
|                            | TAK-242 | 7,48  | 0,04 | 7,48     | 0,08 | 7,51 | 0,04 | 7,54 | 0,03 | 7,56 | 0,04 | 7,56 | 0,04 | 7,56 | 0,05 |      |    |
| Base Excess<br>(mmol/l)    | Control | -1,1  | 3,5  | -1,9     | 1,7  | 0,5  | 2,8  | 1,0  | 2,9  | 4,5  | 4,5  | 5,7  | 3,4  | 7,5  | 3,5  |      |    |
|                            | TAK-242 | 0,7   | 3,4  | -2,5     | 4,9  | 1,2  | 3,4  | 3,1  | 1,8  | 7,0  | 2,3  | 7,9  | 1,5  | 9,5  | 3,2  |      |    |
| Hematocrite<br>(%)         | Control | 33    | 5    | 40       | 6    | 36   | 6    | 36   | 5    | 37   | 9    | 37   | 9    | 36   | 8    |      |    |
|                            | TAK-242 | 33    | 5    | 39       | 3    | 37   | 5    | 36   | 4    | 36   | 3    | 39   | 9    | 38   | 5    |      |    |
| P-Protein<br>(g/l)         | Control | 60    | 5    | 56       | 6    | 57   | 4    | 56   | 3    | 55   | 3    | 54   | 2    | 53   | 3    |      |    |
|                            | TAK-242 | 59    | 6    | 58       | 6    | 53   | 8    | 52   | 7    | 51   | 5    | 52   | 6    | 50   | 6    |      |    |
| Na<br>(mmol/l)             | Control | 146   | 2    | 146      | 3    | 145  | 3    | 144  | 3    | 144  | 3    | 143  | 3    | 144  | 3    |      |    |
|                            | TAK-242 | 145   | 1    | 146      | 3    | 146  | 2    | 146  | 2    | 144  | 2    | 144  | 2    | 144  | 2    |      |    |
| K<br>(mmol/l)              | Control | 3,9   | 0,3  | 3,6      | 0,5  | 4,4  | 0,5  | 4,4  | 1,3  | 4,2  | 1,2  | 3,9  | 0,8  | 3,8  | 0,8  |      |    |
|                            | TAK-242 | 3,8   | 0,5  | 3,9      | 0,4  | 4,6  | 0,7  | 4,4  | 0,8  | 4,0  | 0,7  | 3,6  | 0,4  | 3,7  | 0,5  |      |    |
| U-Prot/U-Crea<br>(mg/mmol) | Control | 43,4  | 4,2  |          |      | 40,3 | 1,7  |      |      |      |      |      |      | 42,2 | 3,1  |      |    |
|                            | TAK-242 | 41,5  | 3,3  |          |      | 41,7 | 2,4  |      |      |      |      |      |      | 41,7 | 2,7  |      |    |
| P-cGMP<br>(pmol/ml)        | Control | 33,3  | 19,7 |          |      | 55,5 | 18,6 |      |      |      |      |      |      | 90,1 | 59,0 |      |    |
|                            | TAK-242 | 25,7  | 9,3  |          |      | 53,0 | 33,5 |      |      |      |      |      |      | 56,1 | 34,4 |      |    |
| U-NOx<br>umol/L            | Control | 24,5  | 15,7 |          |      | 33,5 | 16,8 |      |      |      |      |      |      | 24,5 | 24,9 |      |    |
|                            | TAK-242 | 27,8  | 23,0 |          |      | 34,0 | 15,0 |      |      |      |      |      |      | 24,1 | 14,9 |      |    |
| P-NOx<br>umol/L            | Control | 4,9   | 1,2  |          |      | 7,2  | 2,0  |      |      |      |      |      |      | 7,5  | 2,0  |      |    |
|                            | TAK-242 | 5,7   | 1,2  |          |      | 6,9  | 1,7  |      |      |      |      |      |      | 6,5  | 2,0  |      |    |
