# Supplementary material for: Renal effects of treatment with a TLR4 inhibitor in conscious septic sheep
Source: PubMed Central journal article supplement (PMC4190385; doi:10.1186/s13054-014-0488-y), 2014-09-03

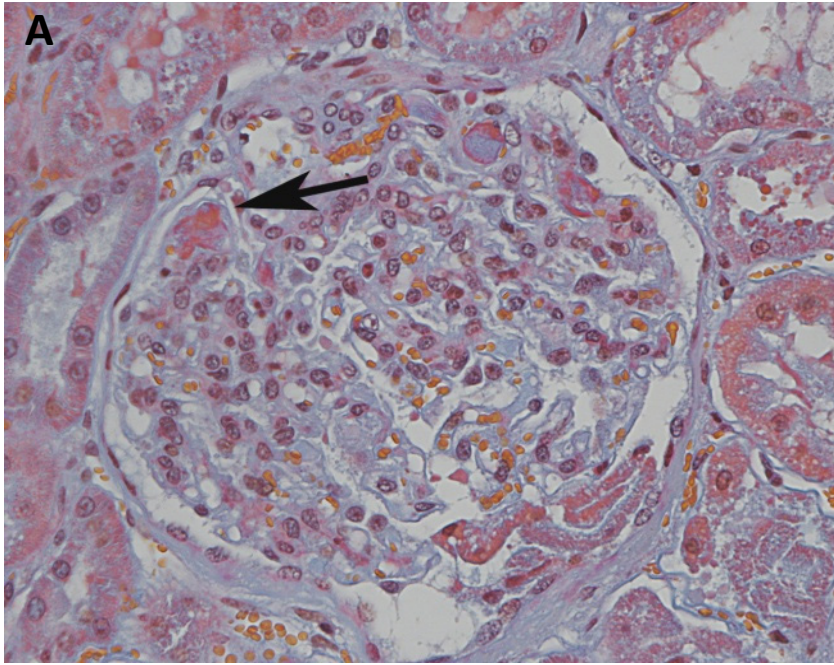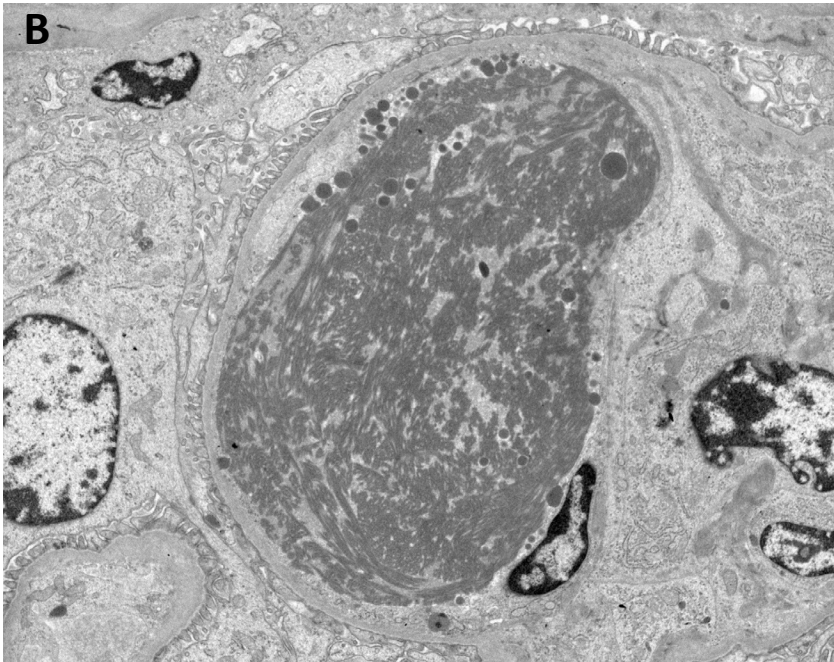

Supplement: 13054_2014_488_MOESM4_ESM.pdf [file 13054_2014_488_MOESM4_ESM.pdf]
