# Supplementary material for: Renal effects of treatment with a TLR4 inhibitor in conscious septic sheep
Source: PubMed Central journal article supplement (PMC4190385; doi:10.1186/s13054-014-0488-y), 2014-09-03
Supplement: 13054_2014_488_MOESM5_ESM.pdf [file 13054_2014_488_MOESM5_ESM.pdf]

|                             |         | Baseline |      | 6     |      | 12    |      | 18    |      | 24    |      | 30    |      | 36    |      |
|-----------------------------|---------|----------|------|-------|------|-------|------|-------|------|-------|------|-------|------|-------|------|
|                             |         | Mean     | SD   | Mean  | SD   | Mean  | SD   | Mean  | SD   | Mean  | SD   | Mean  | SD   | Mean  | SD   |
| MD-Glucose <sub>cort</sub>  | Control | 1,4      | 0,3  | 1,5   | 0,4  | 1,4   | 0,1  | 1,5   | 0,2  | 1,4   | 0,3  | 1,4   | 0,3  | 1,6   | 0,3  |
| (mmol/l)                    | TAK-242 | 1,4      | 0,2  | 1,3   | 0,3  | 1,3   | 0,2  | 1,4   | 0,2  | 1,4   | 0,2  | 1,5   | 0,2  | 1,7   | 0,2  |
| MD-Lactate <sub>cort</sub>  | Control | 0,3      | 0,2  | 0,4   | 0,2  | 0,7   | 0,4  | 1,0   | 0,6  | 1,0   | 0,3  | 1,2   | 0,2  | 1,4   | 0,6  |
| (mmol/l)                    | TAK-242 | 0,3      | 0,1  | 0,6   | 0,3  | 0,9   | 0,4  | 1,1   | 0,7  | 1,1   | 0,3  | 0,7   | 0,5  | 0,9   | 0,5  |
| MD-Pyruvate <sub>cort</sub> | Control | 23,8     | 11,3 | 35,9  | 9,5  | 43,0  | 15,6 | 52,2  | 12,7 | 61,0  | 20,2 | 60,9  | 27,1 | 70,0  | 25,5 |
| (uM)                        | TAK-242 | 25,8     | 5,9  | 32,3  | 10,9 | 43,7  | 21,3 | 59,7  | 42,5 | 85,9  | 36,8 | 75,9  | 36,6 | 83,7  | 18,4 |
| MD-Glucose <sub>med</sub>   | Control | 2,2      | 1,0  | 2,3   | 0,4  | 1,2   | 0,6  | 1,3   | 0,6  | 1,5   | 0,5  | 1,3   | 0,4  | 1,1   | 0,4  |
| (mmol/l)                    | TAK-242 | 2,1      | 0,6  | 1,9   | 0,5  | 1,7   | 0,6  | 1,7   | 0,5  | 1,5   | 0,4  | 1,6   | 0,3  | 1,4   | 0,6  |
| MD-Lactate <sub>med</sub>   | Control | 0,4      | 0,2  | 1,2   | 0,4  | 1,5   | 0,6  | 1,3   | 0,4  | 1,6   | 0,5  | 1,6   | 0,5  | 1,7   | 0,7  |
| (mmol/l)                    | TAK-242 | 0,5      | 0,2  | 1,1   | 0,5  | 1,9   | 0,7  | 2,1   | 0,7  | 1,5   | 0,5  | 1,5   | 0,3  | 1,3   | 0,5  |
| MD-Pyruvate <sub>med</sub>  | Control | 82,9     | 43,9 | 100,7 | 38,0 | 105,9 | 21,8 | 124,0 | 45,7 | 132,9 | 44,5 | 88,3  | 12,3 | 83,9  | 40,4 |
| (umol/l)                    | TAK-242 | 57,1     | 24,6 | 75,8  | 33,9 | 125,0 | 57,6 | 149,2 | 80,9 | 146,8 | 69,6 | 163,9 | 71,1 | 176,8 | 96,9 |

\*

\*
