# Supplementary material for: Renal effects of treatment with a TLR4 inhibitor in conscious septic sheep
Source: PubMed Central journal article supplement (PMC4190385; doi:10.1186/s13054-014-0488-y), 2014-09-03
Supplement: 13054_2014_488_MOESM8_ESM.pdf [file 13054_2014_488_MOESM8_ESM.pdf]

| Group                  | Variabel           | Time (hours) |             |             |
|------------------------|--------------------|--------------|-------------|-------------|
|                        |                    | 0            | 6           | 12          |
| Vehicle animal 1       | pH                 | 7,50         | 7,43        | 7,45        |
| Vehicle animal 2       | pH                 | 7,46         | 7,42        | 7,44        |
| Vehicle animal 3       | pH                 | 7,48         | 7,46        | 7,47        |
| TAK-242 animal 1       | pH                 | 7,47         | 7,53        | 7,51        |
| TAK-242 animal 2       | pH                 | 7,47         | 7,46        | 7,43        |
| TAK-242 animal 3       | pH                 | 7,54         | 7,49        | 7,47        |
| <b>Average Vehicle</b> | pH                 | <b>7,48</b>  | <b>7,44</b> | <b>7,45</b> |
| <b>Average TAK-242</b> | pH                 | <b>7,49</b>  | <b>7,49</b> | <b>7,47</b> |
| Vehicle animal 1       | P-Lactate (mmol/L) | 0,4          | 0,5         | 0,5         |
| Vehicle animal 2       | P-Lactate (mmol/L) | 0,5          | 0,4         | 0,3         |
| Vehicle animal 3       | P-Lactate (mmol/L) | 1            | 0,8         | 0,7         |
| TAK-242 animal 1       | P-Lactate (mmol/L) | 0,4          | 0,5         | 0,5         |
| TAK-242 animal 2       | P-Lactate (mmol/L) | 0,4          | 0,4         | 0,4         |
| TAK-242 animal 3       | P-Lactate (mmol/L) | 0,6          | 0,6         | 0,4         |
| <b>Average Vehicle</b> | P-Lactate (mmol/L) | <b>0,6</b>   | <b>0,6</b>  | <b>0,5</b>  |
| <b>Average TAK-242</b> | P-Lactate (mmol/L) | <b>0,5</b>   | <b>0,5</b>  | <b>0,4</b>  |
| Vehicle animal 1       | P-K+ (mmol/L)      | 3,7          | 4,4         | 4,1         |
| Vehicle animal 2       | P-K+ (mmol/L)      | 3,3          | 4,3         | 4,4         |
| Vehicle animal 3       | P-K+ (mmol/L)      | 3,6          | 3,9         | 4,3         |
| TAK-242 animal 1       | P-K+ (mmol/L)      | 3,4          | 4,5         | 4,4         |
| TAK-242 animal 2       | P-K+ (mmol/L)      | 3,4          | 4,1         | 4,3         |
| TAK-242 animal 3       | P-K+ (mmol/L)      | 4            | 4,4         | 4,4         |
| <b>Average Vehicle</b> | P-K+ (mmol/L)      | <b>3,5</b>   | <b>4,2</b>  | <b>4,3</b>  |
| <b>Average TAK-242</b> | P-K+ (mmol/L)      | <b>3,6</b>   | <b>4,3</b>  | <b>4,4</b>  |
| Vehicle animal 1       | P-Na+ (mmol/L)     | 145          | 146         | 148         |
| Vehicle animal 2       | P-Na+ (mmol/L)     | 147          | 146         | 147         |
| Vehicle animal 3       | P-Na+ (mmol/L)     | 147          | 147         | 147         |
| TAK-242 animal 1       | P-Na+ (mmol/L)     | 147          | 144         | 144         |
| TAK-242 animal 2       | P-Na+ (mmol/L)     | 147          | 146         | 147         |
| TAK-242 animal 3       | P-Na+ (mmol/L)     | 146          | 145         | 146         |
| <b>Average Vehicle</b> | P-Na+ (mmol/L)     | <b>146</b>   | <b>146</b>  | <b>147</b>  |
| <b>Average TAK-242</b> | P-Na+ (mmol/L)     | <b>147</b>   | <b>145</b>  | <b>146</b>  |
