# Supplementary material for: Renal effects of treatment with a TLR4 inhibitor in conscious septic sheep
Source: Springer Nature journal article supplement (doi:10.1186/s13054-014-0488-y), 2014-09-02
Supplement: MOESM2 [file 9779584]

| Sham (n=1)                  |                         | Baseline | 6    | 12   | 18   | 24   | 30   | 36   |
|-----------------------------|-------------------------|----------|------|------|------|------|------|------|
| MAP                         | (mmHg)                  | 97       | 91   | 93   | 86   | 85   | 87   | 90   |
| HR                          | (beats/min)             | 74       | 74   | 62   | 60   | 55   | 55   | 56   |
| CI                          | (l/min/m <sup>2</sup> ) | 3,8      | 4    | 4,8  | 4,1  | 3,9  | 4    | 4,5  |
| RBF                         | (ml/min)                | 298      | 280  | 271  | 242  | 262  | 225  | 220  |
| MPAP                        | (mmHg)                  | 15       | 18   | 14   | 15   | 15   | 15   | 15   |
| pCO <sub>2</sub>            | (kPa)                   | 4,7      | 4,3  | 4,5  | 4,2  | 4,3  | 4,4  | 4,4  |
| pO <sub>2</sub>             | (kPa)                   | 11,8     | 12   | 12,1 | 13,5 | 14,2 | 13,8 | 13,8 |
| pH                          |                         | 7,48     | 7,49 | 7,49 | 7,51 | 7,55 | 7,54 | 7,51 |
| Base Excess                 |                         | 2,9      | 2,3  | 2,7  | 2,1  | 5,8  | 5,5  | 3,8  |
| LD Cortex                   | (%)                     | 100      | 121  | 131  | 97   | 85   | 77   | 83   |
| LD Medulla                  | (%)                     | 100      | 87   | 95   | 87   | 87   | 98   | 98   |
| Lactate <sub>art</sub>      | (mmol/l)                | 0,4      | 0,4  | 0,4  | 0,3  | 0,3  | 0,3  | 0,4  |
| Temperature                 | (oC)                    | 39,2     | 39,4 | 39,2 | 39,1 | 39,1 | 38,9 | 39   |
| P-Protein                   | (g/l)                   | 62       | 63   | 62   | 62   | 61   | 61   | 63   |
| Diuresis                    | (ml/kg/h)               | 0,97     | 0,88 | 0,99 | 0,88 | 1,1  | 1,38 | 1,02 |
| Crea clearance              | (ml/min)                | 134      | 143  | 122  | 114  | 115  | 144  | 122  |
| MD-Glucose <sub>cort</sub>  | (mmol/l)                | 1,8      | 3,5  | 3,5  | 3,1  | 3,1  | 3,3  | 3,5  |
| MD-Lactate <sub>cort</sub>  | (mmol/l)                | 0,3      | 0,7  | 0,3  | 0,3  | 0,3  | 0,2  | 0,2  |
| MD-Pyruvate <sub>cort</sub> | (mmol/l)                | 25,5     | 43,5 | 31,4 | 30,5 | 24,7 | 17,4 | 16,6 |
| L/P <sub>cort</sub>         |                         | 11,7     | 15,6 | 10,7 | 11   | 13,5 | 11,6 | 14,4 |
| MD-Glucose <sub>med</sub>   | (mmol/l)                | 2,7      | 3,7  | 3,8  | 3,6  | 3,3  | 3,1  | 2,6  |
| MD-Lactate <sub>med</sub>   | (mmol/l)                | 0,4      | 0,8  | 0,7  | 0,4  | 0,2  | 0,2  | 0,2  |
| MD-Pyruvate <sub>med</sub>  | (mmol/l)                | 36,9     | 53,3 | 45,6 | 19,6 | 22   | 33,4 | 18,4 |
| L/P <sub>med</sub>          |                         | 12       | 14,5 | 14,5 | 19   | 9,8  | 5,1  | 12,2 |
